# Supplementary material
Source: publisher site journal article supplement (https://www.dovepress.com/article/458257)
Supplement: Supplementary file 1 [file get_supplementary_file.php]

**Electronic Supplementary File (ESF)**

**Complex intersections between adverse childhood experiences and negative life events impact the phenome of major depression.**

Asara Vasupanrajit1,2*, Michael Maes1-9*, Ketsupar Jirakran1,2,10, Chavit Tunvirachaisakul1,2,5

* Joint first authorship.

1Department of Psychiatry, Faculty of Medicine, Chulalongkorn University, Bangkok, Thailand; 2Ph.D. Program in Mental Health, Department of Psychiatry, Faculty of Medicine, Chulalongkorn University, Bangkok, Thailand; 3Sichuan Provincial Center for Mental Health, Sichuan Provincial People’s Hospital, School of Medicine, University of Electronic Science and Technology of China, Chengdu, China; 4Key Laboratory of Psychosomatic Medicine, Chinese Academy of Medical Sciences, Chengdu, China; 5Center of Excellence in Cognitive Impairment and Dementia Research Unit, Faculty of Medicine, Chulalongkorn University, Bangkok, Thailand; 6Cognitive Fitness and Biopsychological Technology Research Unit, Faculty of Medicine Chulalongkorn University, Bangkok, Thailand; 7Department of Psychiatry, Medical University of Plovdiv, Plovdiv, Bulgaria; 8Research Institute, Medical University of Plovdiv, Plovdiv, Bulgaria; 9Kyung Hee University, Seoul, Republic of Korea; 10Center of Excellence for Maximizing Children's Developmental Potential, Department of Pediatric, Faculty of Medicine, Chulalongkorn University, Bangkok, Thailand

**ESF, Table 1.** Description of childhood adversities from The Adverse Childhood Experiences (ACEs) Questionnaire and negative life events (NLEs) from The Negative Event Scale (NES).

| **PC labeled** | **Items** | **Description** |
| --- | --- | --- |
| **ACEs items that were included in the validated single principal component (PC) score.** | | |
| PC-ACE abuse | 1 | Had been condemned, despised, and hated |
| 2 | Had been fearful of getting injured. |
| 3 | Experienced aggressively pushed, grabbed, smacked, dragged, or thrown. |
| 4 | Experienced violent hits left a mark or wounded you. |
| PC-ACE sexual abuse | 5 | Sexually touched. |
| 6 | Someone letting you touch their bodies in a sexual way |
| 7 | Someone trying to have sex with you. |
| PC-ACE neglect | 9 | Certain family members make you feel important and special. |
| 10 | Feel that you are beloved. |
| 11 | Your family members care about and love each other. |
| 12 | Your family members have deep connections. |
| 13 | Your family can be your strength and support. |
| 15 | You are aware that you have been shielded and take precautions. |
| PC-ACE family | 19 | Your mother or stepmother have been violently pushed. |
| 20 | Your mother or stepmother have been punched with fists or solid objects. |
| 21 | Your mother or stepmother have been repeatedly beaten. |
| 22 | Your mother or stepmother have been threatened with a knife or a gun. |
| 25 | You have family members who have mental disorders. |
| 26 | You have family members who have suicide behaviors. |
| 27 | Divorced parents. |
| **ACEs items that were unable to include in the validated single PC score.** | | |
|  | 8 | Forced to have sex. |
|  | 14 | Eat an insufficient diet. |
|  | 16 | Your parents are alcohol and drug addicted, so they cannot take care of the family |
|  | 17 | Wear dirty clothes. |
|  | 18 | Someone brought you to meet the doctor if you needed. |
|  | 23 | Living with someone who is a heavy drinker or an alcoholic. |
|  | 24 | Living with someone who is on drugs. |
|  | 28 | Your family members have been in prison. |
| **NES** **items that were included in the validated single PC score.**  **“How much of a hassle was this negative life event that you experienced in the last month?”** | | |
| PC-NLE self | 10-13 | Money, i.e., insufficient money for basics (e.g., food, clothes, shelter, health care, etc.), insufficient money for education, insufficient money for emergencies, insufficient money for extras (e.g., entertainment, recreation, vacations, etc.). |
| 34-37 | Health problems, i.e., your health, your physical abilities, your medical care, getting sick (e.g., flu, colds). |
| PC-NLE relationship | 1-4 | Hassel with friend/s, i.e., negative comments from friend/s, negative conversation with friend/s, conflict with a friend/s, disagreement (including arguments) with a friend/s. |
| 22-25 | Hassel with parent/s, i.e., negative communication with your parent/s, conflict with your parent/s, disagreement (including arguments) with your parent/s, negative comments from your parent/s. |
| 26-29 | Hassel with other student/s, i.e., negative communication with other student/s, conflict with other student/s, disagreement (including arguments) with other student/s, doing things with other student/s. |
| 30-33 | Hassel with relative/s, i.e., conflict with relative/s, disagreement (including arguments) with relative/s, negative comments from relative/s, doing things with relative/s. |
| PC-NLE academic | 14-17 | Hassel in academic course, i.e., number of homework/reports/other burdens from your study, the deadline for submitting homework/reports, time pressures, difficulties completing assignments/essays. |
| 38-40 | Hassel with limitation in academic ability, i.e., not getting the results you expected, your academic ability not as good as you believe, some subjects are difficult to understand. |
| 41-42 | Hassles in course interest, i.e., This course is not relevant to your future career, your course is boring. |
| **NES items that were unable to include in the validated single PC score.** | | |
|  | 5-9 | Hassel with partner (boyfriends/girlfriends), i.e., negative communication with your partner, conflict with your partner, disagreement (including arguments) with your partner, rejection by your partner, your partner let you down. |
|  | 18-21 | Hassel with teachers/lecturers, i.e., negative communication with teachers/lecturers, negative comments from teachers/lecturers, conflict with teachers/lecturers, disagreement (including arguments) with teachers/lecturers. |

**This table summarizes from:**

Felitti VJ, Anda RF, Nordenberg D, et al. Relationship of childhood abuse and household dysfunction to many of the leading causes of death in adults. The Adverse Childhood Experiences (ACE) Study. Am J Prev Med. 1998;14(4):245-258. doi:10.1016/s0749-3797(98)00017-8

Maybery D. Incorporating interpersonal events within hassle measurement. Stress and Health. 2003;19(2):97-110.

Jirakran K, Vasupanrajit A, Tunvirachaisakul C, Maes M. The effects of adverse childhood experiences on depression and suicidal behaviors are partially mediated by neuroticism: A subclinical manifestation of major depression. Front Psychiatry. 2023;14:1158036. doi:10.3389/fpsyt.2023.1158036

**ESF, Table 2.** Principal components (PCs) analysis of suicide based on the items of The Columbia–Suicide Severity Rating Scale (C-SSRS) and brooding based on the items of the Ruminative Response Scale (RRS) rating scale.

| **PC labeled** | **Items** | **Description** | **Loading** |
| --- | --- | --- | --- |
| Brooding  KMO = 0.933  Χ2 = 1357.987 (df=120), p<0.001***  VE = 58.01% | RRS1 | Think: how lonely you are. | 0.791 |
| RRS2 | Think: "I won't be able to do my job if I don't snap out of this" | 0.754 |
| RRS3 | Think: how exhausted and weak you feel. | 0.842 |
| RRS4 | Think: how difficult it is to focus. | 0.793 |
| RRS5 | Think: "What have I done to deserve this?" | 0.722 |
| RRS6 | Think: how helpless and unmotivated you feel. | 0.771 |
| RRS9 | Think: “Why can't I get started?” | 0.762 |
| RRS10 | Think: "Why do I always react like this?" | 0.567 |
| RRS13 | Think: about recent circumstance in which you wish things had gone differently. | 0.611 |
| RRS14 | Think: "If I keep feeling like this, I won't be able to concentrate." | 0.720 |
| RRS15 | Think: "Why do I have problems that others do not?" | 0.731 |
| RRS16 | Think: "How come I can't handle things better?" | 0.811 |
| RRS17 | Think: how depressed you are. | 0.854 |
| RRS18 | Think: about all your weaknesses, foibles, faults, and errors. | 0.846 |
| RRS19 | Think: how you don't feel like undertaking anything. | 0.815 |
| RRS22 | Think: how furious you are with yourself. | 0.733 |
| Lifetime SI  KMO = 0.892 Χ2 = 1202.750 (df=45), p<0.001*** VE=68.783% | SI_LT1 | CSSR Lifetime wish to be death | 0.869 |
| SI_LT2 | CSSR Lifetime non-specific active suicidal thought | 0.880 |
| SI_LT3 | CSSR Lifetime suicidal thoughts with methods | 0.873 |
| SI_LT4 | CSSR Lifetime suicidal intent | 0.801 |
| SI_LT5 | CSSR Lifetime suicidal intent with plan | 0.702 |
| SI_LT6 | CSSR Lifetime frequency of suicide ideation | 0.855 |
| SI_LT7 | CSSR Lifetime duration of suicide ideation | 0.871 |
| SI_LT8 | CSSR Lifetime ability to control suicide ideation | 0.840 |
| SI_LT9 | CSSR Lifetime deterrent to suicide | 0.787 |
| SI_LT10 | CSSR Lifetime reason of suicidal ideation | 0.799 |
| Current SI  KMO = 0.867 Χ2 = 1297.079 (df=45), p<0.001*** VE=66.232% | SI_C1 | CSSR Current wish to be death (1 month) | 0.896 |
| SI_C2 | CSSR Current non-specific active suicidal thought (1 month) | 0.836 |
| SI_C3 | CSSR Current suicidal thoughts with methods (1 month) | 0.832 |
| SI_C4 | CSSR Current suicidal intent (1 month) | 0.690 |
| SI_C5 | CSSR Current suicidal intent with plan (1 month) | 0.564 |
| SI_C6 | CSSR Current frequency of suicide ideation (1 month) | 0.886 |
| SI_C7 | CSSR Current duration of suicide ideation (1 month) | 0.869 |
| SI_C8 | CSSR Current ability to control suicide ideation (1 month) | 0.848 |
| SI_C9 | CSSR Current deterrent to suicide (1 month) | 0.792 |
| SI_C10 | CSSR Current reason of suicidal ideation (1 month) | 0.866 |
| Lifetime SA  KMO = 0.821  Χ2 = 679.114 (df=10), p<0.001***  VE=77.791% | SA_LT1 | CSSR Lifetime suicidal behavior actual attempt | 0.917 |
| SA_LT4 | CSSR Lifetime interrupted attempt | 0.793 |
| SA_LT6 | CSSR Lifetime self-interrupted attempt | 0.776 |
| SA_LT8 | CSSR Lifetime preparatory acts | 0.952 |
| SA_LT9 | CSSR Lifetime suicidal acts | 0.954 |
| Current SA  KMO = 0.714 Χ2 = 617.758 (df=10), p<0.001*** VE=69.984% | SA_C1 | CSSR Current suicidal behavior actual attempt (1 month) | 0.902 |
| SA_C2 | CSSR Current total number of suicidal behavior actual attempt (1 month) | 0.893 |
| SA_C6 | CSSR Current self-interrupted attempt (1 month) | 0.592 |
| SA_C8 | CSSR Current preparatory acts (1 month) | 0.867 |
| SA_C9 | CSSR Current suicidal acts (1 month) | 0.886 |

SI: suicide ideation; SA: suicide attempt; KMO: The Kaiser-Meyer-Olkin Test; VE: Variance explained; Χ2: Bartlett’s test of sphericity.

We extracted the principal component of “brooding” from RRS item 1, 2, 3, 4, 5, 6, 9, 10, 13, 14, 15, 16, 17, 18, 19, and 22 (KMO=0.933, Bartlett’s χ2=1357.987, df=120, p<0.001, explained variance=58.01%, all loading≥0.6). The “lifetime SI” from SI_LT item 1, 2, 3, 4, 5, 6, 7, 8, 9, and 10 (KMO=0.892, Bartlett’s χ2=1202.750, df=45, p<0.001, explained variance=68.783%, all loading≥0.7). The “current SI” was computed from SI_C item 1, 2, 3, 4, 5, 6, 7, 8, 9, and 10 (KMO=0.867, Bartlett’s χ2=1297.079, df=45, p<0.001, explained variance=66.232%, all loading≥0.6). The “lifetime SA” was computed from SA_LT item 1, 4, 6, 8, and 9 (KMO=0.821, Bartlett’s χ2=679.114, df=10, p<0.001, explained variance=77.791%, all loading≥0.8). The “current SA” was computed from SA_C item 1, 2, 6, 8, and 9 (KMO=0.714, Bartlett’s χ2=617.758, df=10, p<0.001, explained variance=69.987%, all loading≥0.6). The lifetime SB was conceptualized by lifetime SI and SA. The current SB was conceptualized by current SI and SA. The “all SB” was conceptualized by lifetime SB and current SB.

**This table summarizes from:**

Vasupanrajit A, Maes M, Jirakran K, Tunvirachaisakul C. Brooding and neuroticism are strongly interrelated manifestations of the phenome of depression. 2023;14. doi:10.3389/fpsyt.2023.1249839
